# Supplementary material
Source: Springer Nature journal article supplement (https://www.springermedizin.de/resource/supplementary/12885_2010_2300_MOESM5_ESM.pdf/9460970)

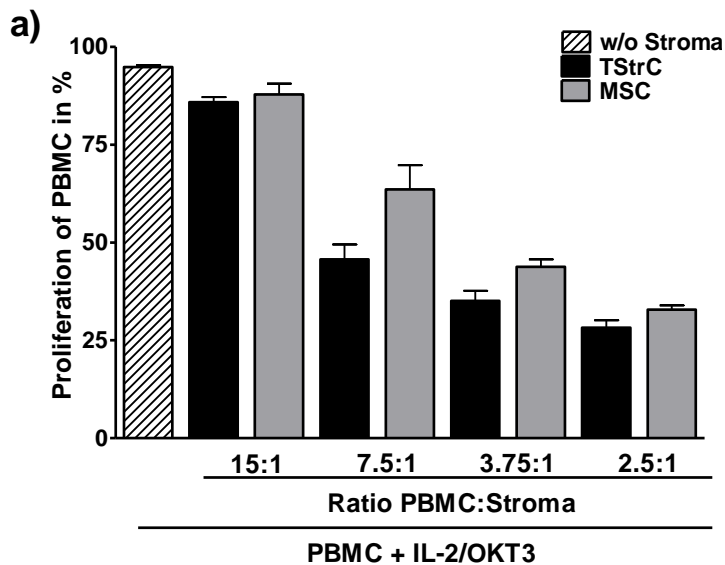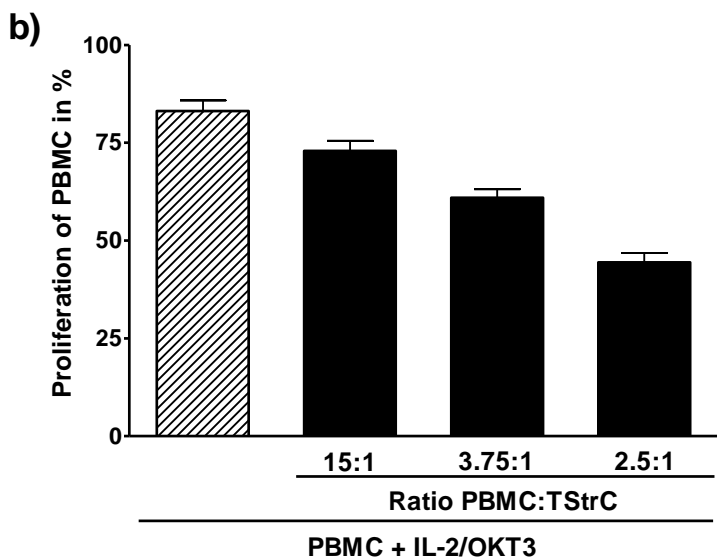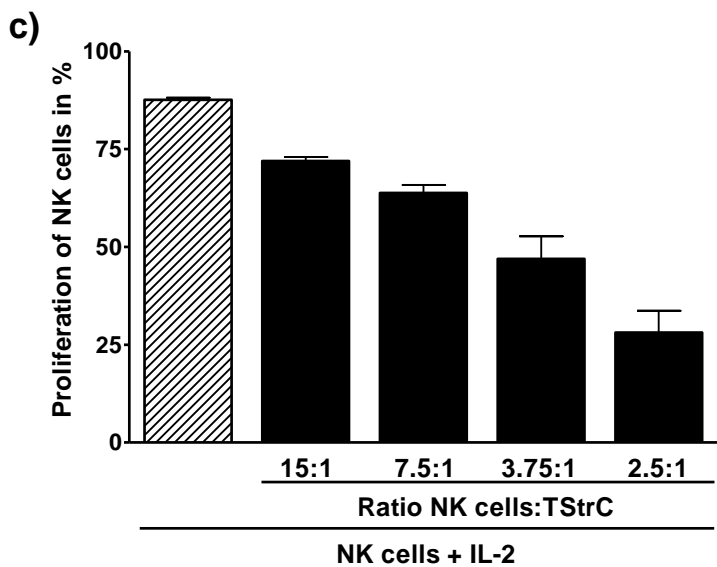

Supplement: MOESM5 [file 9460970]
